# Supplementary material for: Study on Fluorescence Properties of Green-Blue Apatite
Source: MDPI journal article supplement (doi:10.3390/cryst12060866), 2022-06-19
Supplement: s1 [file s1]

# Study on Fluorescence Properties of Green-Blue Apatite

Qicheng Yan<sup>1</sup>, Ziyuan Liu<sup>1</sup> and Ying Guo <sup>1,\*</sup>

<sup>1</sup> School of Gemmology , China University of Geosciences, Beijing 100083, China; 2109190004@cugb.edu.cn (Q.Y.);  
\* Correspondence: guoying@cugb.edu.cn

Table S1: 3D Fluorescence Data of G-1 Apatite.

|     | 260   | 270   | 280   | 290   | 300   | 310   | 320   | 330   | 340  | 350  | 360  | 370  | 380  | 390  | 400    | 410   |
|-----|-------|-------|-------|-------|-------|-------|-------|-------|------|------|------|------|------|------|--------|-------|
| 280 | 4580  |       |       |       |       |       |       |       |      |      |      |      |      |      |        |       |
| 290 | 3295  | 5186  |       |       |       |       |       |       |      |      |      |      |      |      |        |       |
| 300 | 5497  | 6628  | 3847  |       |       |       |       |       |      |      |      |      |      |      |        |       |
| 310 | 15724 | 9267  | 3687  | 2899  |       |       |       |       |      |      |      |      |      |      |        |       |
| 320 | 12496 | 8388  | 10056 | 5214  | 4106  |       |       |       |      |      |      |      |      |      |        |       |
| 330 | 14874 | 10088 | 9329  | 8450  | 10608 | 6191  |       |       |      |      |      |      |      |      |        |       |
| 340 | 10076 | 9852  | 13403 | 13228 | 14665 | 14373 | 6844  |       |      |      |      |      |      |      |        |       |
| 350 | 13618 | 11667 | 12623 | 13194 | 16971 | 19048 | 8422  | 3872  |      |      |      |      |      |      |        |       |
| 360 | 11829 | 10521 | 9678  | 14655 | 19620 | 18156 | 13595 | 5927  | 3296 |      |      |      |      |      |        |       |
| 370 | 10211 | 11250 | 11367 | 13810 | 18358 | 19884 | 14159 | 8725  | 4342 | 1905 |      |      |      |      |        |       |
| 380 | 8664  | 7933  | 8576  | 12301 | 15976 | 17894 | 12262 | 8275  | 5652 | 3417 | 2122 |      |      |      |        |       |
| 390 | 11867 | 7275  | 8704  | 11453 | 16385 | 15506 | 12035 | 6592  | 4350 | 4818 | 3119 | 2057 |      |      |        |       |
| 400 | 11698 | 12323 | 8734  | 9713  | 14162 | 15354 | 15101 | 7374  | 4754 | 3465 | 3933 | 2991 | 1580 |      |        |       |
| 410 | 10873 | 8829  | 8123  | 10223 | 13681 | 15169 | 12566 | 7970  | 4692 | 3323 | 3169 | 3535 | 2829 | 2204 |        |       |
| 420 | 14203 | 9075  | 9338  | 35032 | 14624 | 14824 | 14387 | 10795 | 5166 | 3375 | 3125 | 3543 | 3529 | 3205 | 3942   |       |
| 430 | 8302  | 11458 | 9444  | 12447 | 15187 | 14888 | 13785 | 10581 | 6147 | 3587 | 3260 | 3144 | 3423 | 4683 | 5845   | 5498  |
| 440 | 10400 | 10500 | 9174  | 9489  | 12269 | 13960 | 13927 | 10171 | 6049 | 4632 | 4274 | 3026 | 3254 | 5095 | 9399   | 8901  |
| 450 | 12014 | 10089 | 9303  | 10028 | 10552 | 18543 | 12034 | 9034  | 5462 | 5618 | 6236 | 3612 | 3650 | 5305 | 10350  | 11447 |
| 460 | 12214 | 9086  | 6679  | 7040  | 8471  | 9505  | 11550 | 8314  | 5290 | 4053 | 3975 | 3859 | 3264 | 4412 | 7957   | 10634 |
| 470 | 11106 | 8329  | 6379  | 6679  | 8215  | 9079  | 17928 | 8004  | 4854 | 3752 | 3559 | 2805 | 3050 | 4348 | 8614   | 9717  |
| 480 | 11019 | 6587  | 6530  | 6709  | 9038  | 10305 | 9347  | 8048  | 4488 | 4041 | 2441 | 2369 | 2736 | 4570 | 7090   | 8879  |
| 490 | 9879  | 7111  | 9477  | 6219  | 7471  | 8464  | 7174  | 5828  | 5064 | 3081 | 2452 | 1961 | 2251 | 3265 | 6034   | 7372  |
| 500 | 8063  | 8246  | 4123  | 5913  | 5052  | 5785  | 5758  | 4386  | 2788 | 2656 | 1735 | 1783 | 2063 | 2286 | 5340   | 5999  |
| 510 |       | 5898  | 4531  | 4175  | 4507  | 4216  | 4522  | 3376  | 2494 | 2177 | 1832 | 1841 | 1150 | 1961 | 3770   | 4955  |
| 520 |       | 7088  | 4430  | 4686  | 4117  | 4310  | 3822  | 2948  | 2055 | 1764 | 2392 | 1663 | 1521 | 1747 | 3400   | 3762  |
| 530 |       |       | 4511  | 4511  | 4463  | 4443  | 3588  | 2583  | 2263 | 1724 | 1118 | 1251 | 1190 | 1276 | 2675   | 3809  |
| 540 |       |       | 5285  | 5574  | 5341  | 5684  | 5025  | 3262  | 1927 | 1349 | 1214 | 1177 | 1133 | 1209 | 2794   | 4177  |
| 550 |       |       |       | 7609  | 6583  | 7410  | 5088  | 2987  | 1930 | 1467 | 1279 | 1332 | 1642 | 1087 | 3558   | 4949  |
| 560 |       |       |       | 7769  | 9341  | 6761  | 7800  | 4886  | 1952 | 1613 | 1784 | 1046 | 1190 | 1717 | 11974  | 8107  |
| 570 |       |       |       |       | 12577 | 10314 | 8229  | 4179  | 1684 | 1849 | 1669 | 1408 | 1795 | 2926 | 11897  | 7951  |
| 580 |       |       |       |       | 10450 | 13033 | 7012  | 4530  | 2264 | 1733 | 1080 | 1188 | 2013 | 4168 | 6677   | 5374  |
| 590 |       |       |       |       |       | 10093 | 6605  | 2860  | 1573 | 1487 | 1207 | 1402 | 2243 | 2285 | 15076  | 8553  |
| 600 |       |       |       |       |       | 16415 | 15305 | 6371  | 3248 | 1693 | 4614 | 3558 | 6044 | 8809 | 113385 | 41113 |
| 610 |       |       |       |       |       |       | 11266 | 6699  | 2519 | 1676 | 2433 | 1756 | 3140 | 2941 | 32390  | 14571 |
| 620 |       |       |       |       |       |       | 7736  | 7000  | 2306 | 1070 | 1465 | 1139 | 2402 | 1869 | 9281   | 5840  |
| 630 |       |       |       |       |       |       |       | 4776  | 2245 | 1145 | 2767 | 2058 | 1552 | 1697 | 8714   | 5755  |
| 640 |       |       |       |       |       |       |       | 3741  | 5809 | 2867 | 2436 | 2506 | 3107 | 2298 | 22340  | 10675 |
| 650 |       |       |       |       |       |       |       |       | 3651 | 1360 | 2855 | 3071 | 2760 | 3469 | 28846  | 12311 |
| 660 |       |       |       |       |       |       |       |       | 3216 | 3018 | 2468 | 1721 | 2160 | 2256 | 11662  | 5552  |
| 670 |       |       |       |       |       |       |       |       |      | 3855 | 1669 | 1608 | 2905 | 1464 | 3581   | 2654  |
| 680 |       |       |       |       |       |       |       |       |      | 3003 | 4261 | 2144 | 1730 | 1374 | 4248   | 1788  |
| 690 |       |       |       |       |       |       |       |       |      |      | 4037 | 1503 | 3060 | 2847 | 5364   | 3366  |
| 700 |       |       |       |       |       |       |       |       |      |      | 4317 | 2747 | 3440 | 1924 | 8844   | 3695  |
| 710 |       |       |       |       |       |       |       |       |      |      |      | 4859 | 2410 | 2678 | 11538  | 4664  |
| 720 |       |       |       |       |       |       |       |       |      |      |      | 4845 | 5755 | 5401 | 6580   | 7113  |
| 730 |       |       |       |       |       |       |       |       |      |      |      |      | 5151 | 5010 | 3973   | 3506  |
| 740 |       |       |       |       |       |       |       |       |      |      |      |      | 4747 | 7957 | 3906   | 2879  |
| 750 |       |       |       |       |       |       |       |       |      |      |      |      |      | 4863 | 6778   | 6471  |

Table S2: 3D Fluorescence Data of G-1 Apatite.

|     | 420   | 430   | 440    | 450    | 460    | 470    | 480    | 490    | 500   | 510   | 520  | 530  | 540  | 550  | 560  | 570   |
|-----|-------|-------|--------|--------|--------|--------|--------|--------|-------|-------|------|------|------|------|------|-------|
| 280 |       |       |        |        |        |        |        |        |       |       |      |      |      |      |      |       |
| 290 |       |       |        |        |        |        |        |        |       |       |      |      |      |      |      |       |
| 300 |       |       |        |        |        |        |        |        |       |       |      |      |      |      |      |       |
| 310 |       |       |        |        |        |        |        |        |       |       |      |      |      |      |      |       |
| 320 |       |       |        |        |        |        |        |        |       |       |      |      |      |      |      |       |
| 330 |       |       |        |        |        |        |        |        |       |       |      |      |      |      |      |       |
| 340 |       |       |        |        |        |        |        |        |       |       |      |      |      |      |      |       |
| 350 |       |       |        |        |        |        |        |        |       |       |      |      |      |      |      |       |
| 360 |       |       |        |        |        |        |        |        |       |       |      |      |      |      |      |       |
| 370 |       |       |        |        |        |        |        |        |       |       |      |      |      |      |      |       |
| 380 |       |       |        |        |        |        |        |        |       |       |      |      |      |      |      |       |
| 390 |       |       |        |        |        |        |        |        |       |       |      |      |      |      |      |       |
| 400 |       |       |        |        |        |        |        |        |       |       |      |      |      |      |      |       |
| 410 |       |       |        |        |        |        |        |        |       |       |      |      |      |      |      |       |
| 420 |       |       |        |        |        |        |        |        |       |       |      |      |      |      |      |       |
| 430 |       |       |        |        |        |        |        |        |       |       |      |      |      |      |      |       |
| 440 | 4825  |       |        |        |        |        |        |        |       |       |      |      |      |      |      |       |
| 450 | 6996  | 5854  |        |        |        |        |        |        |       |       |      |      |      |      |      |       |
| 460 | 7223  | 5487  | 7429   |        |        |        |        |        |       |       |      |      |      |      |      |       |
| 470 | 7689  | 7068  | 8545   | 10884  |        |        |        |        |       |       |      |      |      |      |      |       |
| 480 | 6434  | 7993  | 12968  | 16757  | 13558  |        |        |        |       |       |      |      |      |      |      |       |
| 490 | 6573  | 6723  | 32938  | 38970  | 20118  | 31514  |        |        |       |       |      |      |      |      |      |       |
| 500 | 5344  | 6438  | 13895  | 19994  | 12716  | 14866  | 11856  |        |       |       |      |      |      |      |      |       |
| 510 | 4842  | 5005  | 6749   | 8305   | 10578  | 8441   | 7040   | 8328   |       |       |      |      |      |      |      |       |
| 520 | 4679  | 4429  | 6638   | 9042   | 11417  | 9761   | 7783   | 6824   | 7995  |       |      |      |      |      |      |       |
| 530 | 3413  | 3849  | 9179   | 12919  | 10281  | 19084  | 11750  | 9184   | 6946  | 7934  |      |      |      |      |      |       |
| 540 | 4131  | 4293  | 7870   | 9705   | 13921  | 12960  | 13386  | 13214  | 7579  | 6433  | 7271 |      |      |      |      |       |
| 550 | 4388  | 4137  | 11186  | 7718   | 8008   | 11517  | 8181   | 13648  | 13858 | 6334  | 6208 | 6483 |      |      |      |       |
| 560 | 10156 | 6612  | 8863   | 11118  | 10023  | 16681  | 13035  | 10264  | 14386 | 10143 | 6025 | 5978 | 7153 |      |      |       |
| 570 | 8744  | 5886  | 8409   | 11306  | 15838  | 17012  | 13575  | 10270  | 6559  | 9702  | 7634 | 5752 | 5203 | 6371 |      |       |
| 580 | 5117  | 6392  | 14973  | 20761  | 12094  | 20313  | 14056  | 9983   | 5779  | 4416  | 6311 | 6040 | 4720 | 4034 | 4769 |       |
| 590 | 11683 | 6241  | 80324  | 100000 | 44196  | 93661  | 49061  | 32332  | 7646  | 5985  | 3921 | 7580 | 5850 | 5153 | 4872 | 9515  |
| 600 | 68754 | 18062 | 278974 | 322581 | 168387 | 338537 | 190143 | 115169 | 19442 | 6046  | 6207 | 8598 | 8752 | 8258 | 8375 | 25193 |
| 610 | 23103 | 13205 | 249763 | 284995 | 134405 | 248738 | 156328 | 90898  | 12164 | 4890  | 7014 | 5361 | 6482 | 6708 | 7434 | 24236 |
| 620 | 6089  | 8400  | 118304 | 124004 | 65246  | 103259 | 77658  | 38995  | 12697 | 4807  | 3776 | 5855 | 4040 | 6347 | 5820 | 14924 |
| 630 | 7660  | 4867  | 38841  | 45782  | 26104  | 38028  | 34564  | 17892  | 5053  | 7494  | 4370 | 3737 | 2927 | 2824 | 5402 | 8621  |
| 640 | 18250 | 4915  | 17310  | 18061  | 18975  | 35202  | 25458  | 17466  | 6624  | 3607  | 2825 | 4120 | 3623 | 3791 | 2902 | 5667  |
| 650 | 21902 | 5182  | 22680  | 27795  | 21378  | 45729  | 28880  | 19271  | 12644 | 7032  | 8836 | 3797 | 3367 | 3625 | 3218 | 2370  |
| 660 | 8391  | 3294  | 7497   | 7850   | 9502   | 18431  | 15277  | 9157   | 5560  | 3928  | 3698 | 8299 | 3073 | 3048 | 3110 | 2379  |
| 670 | 3565  | 4060  | 6869   | 10499  | 9255   | 11352  | 10756  | 7161   | 4836  | 6099  | 2983 | 2613 | 8138 | 2980 | 2598 | 4529  |
| 680 | 3052  | 3562  | 9902   | 13215  | 9443   | 12669  | 8916   | 9756   | 6650  | 4742  | 4228 | 2435 | 3446 | 7072 | 2274 | 2218  |
| 690 | 3901  | 5806  | 17822  | 16742  | 12319  | 16880  | 13810  | 11577  | 10578 | 4608  | 3605 | 7879 | 2687 | 2766 | 3802 | 2811  |
| 700 | 6800  | 4088  | 18273  | 23680  | 16533  | 29357  | 18557  | 13180  | 9706  | 5565  | 3215 | 3545 | 4366 | 7160 | 7208 | 2381  |
| 710 | 8687  | 4069  | 17124  | 20782  | 18860  | 28396  | 19719  | 16413  | 9728  | 5807  | 4628 | 3501 | 7534 | 2917 | 3689 | 7284  |
| 720 | 4831  | 3928  | 13060  | 16960  | 12828  | 15449  | 12744  | 9290   | 10265 | 5424  | 3869 | 3592 | 6316 | 3686 | 2841 | 2201  |
| 730 | 2992  | 9750  | 9847   | 21355  | 14342  | 22737  | 12531  | 17323  | 7747  | 8045  | 6607 | 6359 | 3661 | 4201 | 5139 | 2308  |
| 740 | 4582  | 4030  | 14800  | 11352  | 14408  | 16303  | 11539  | 16075  | 9708  | 11929 | 6563 | 6001 | 3667 | 4065 | 2514 | 2601  |
| 750 | 2717  | 4611  | 10207  | 15741  | 12230  | 15969  | 13220  | 8429   | 7094  | 4952  | 8003 | 5802 | 5805 | 4717 | 2523 | 4928  |

Table S3: 3D Fluorescence Data of G-1 Apatite.

| 280 | 580   | 590   | 600   | 610  | 620  | 630  | 640  | 650  | 660  | 670  | 680  | 690  | 700  | 710  | 720  | 730  |
|-----|-------|-------|-------|------|------|------|------|------|------|------|------|------|------|------|------|------|
| 290 |       |       |       |      |      |      |      |      |      |      |      |      |      |      |      |      |
| 300 |       |       |       |      |      |      |      |      |      |      |      |      |      |      |      |      |
| 310 |       |       |       |      |      |      |      |      |      |      |      |      |      |      |      |      |
| 320 |       |       |       |      |      |      |      |      |      |      |      |      |      |      |      |      |
| 330 |       |       |       |      |      |      |      |      |      |      |      |      |      |      |      |      |
| 340 |       |       |       |      |      |      |      |      |      |      |      |      |      |      |      |      |
| 350 |       |       |       |      |      |      |      |      |      |      |      |      |      |      |      |      |
| 360 |       |       |       |      |      |      |      |      |      |      |      |      |      |      |      |      |
| 370 |       |       |       |      |      |      |      |      |      |      |      |      |      |      |      |      |
| 380 |       |       |       |      |      |      |      |      |      |      |      |      |      |      |      |      |
| 390 |       |       |       |      |      |      |      |      |      |      |      |      |      |      |      |      |
| 400 |       |       |       |      |      |      |      |      |      |      |      |      |      |      |      |      |
| 410 |       |       |       |      |      |      |      |      |      |      |      |      |      |      |      |      |
| 420 |       |       |       |      |      |      |      |      |      |      |      |      |      |      |      |      |
| 430 |       |       |       |      |      |      |      |      |      |      |      |      |      |      |      |      |
| 440 |       |       |       |      |      |      |      |      |      |      |      |      |      |      |      |      |
| 450 |       |       |       |      |      |      |      |      |      |      |      |      |      |      |      |      |
| 460 |       |       |       |      |      |      |      |      |      |      |      |      |      |      |      |      |
| 470 |       |       |       |      |      |      |      |      |      |      |      |      |      |      |      |      |
| 480 |       |       |       |      |      |      |      |      |      |      |      |      |      |      |      |      |
| 490 |       |       |       |      |      |      |      |      |      |      |      |      |      |      |      |      |
| 500 |       |       |       |      |      |      |      |      |      |      |      |      |      |      |      |      |
| 510 |       |       |       |      |      |      |      |      |      |      |      |      |      |      |      |      |
| 520 |       |       |       |      |      |      |      |      |      |      |      |      |      |      |      |      |
| 530 |       |       |       |      |      |      |      |      |      |      |      |      |      |      |      |      |
| 540 |       |       |       |      |      |      |      |      |      |      |      |      |      |      |      |      |
| 550 |       |       |       |      |      |      |      |      |      |      |      |      |      |      |      |      |
| 560 |       |       |       |      |      |      |      |      |      |      |      |      |      |      |      |      |
| 570 |       |       |       |      |      |      |      |      |      |      |      |      |      |      |      |      |
| 580 |       |       |       |      |      |      |      |      |      |      |      |      |      |      |      |      |
| 590 |       |       |       |      |      |      |      |      |      |      |      |      |      |      |      |      |
| 600 | 36834 |       |       |      |      |      |      |      |      |      |      |      |      |      |      |      |
| 610 | 31649 | 55689 |       |      |      |      |      |      |      |      |      |      |      |      |      |      |
| 620 | 14116 | 23988 | 19693 |      |      |      |      |      |      |      |      |      |      |      |      |      |
| 630 | 7146  | 9453  | 8045  | 4020 |      |      |      |      |      |      |      |      |      |      |      |      |
| 640 | 3931  | 4343  | 3691  | 2552 | 2234 |      |      |      |      |      |      |      |      |      |      |      |
| 650 | 4225  | 4976  | 3619  | 3231 | 2362 | 2639 |      |      |      |      |      |      |      |      |      |      |
| 660 | 1346  | 3565  | 5302  | 2637 | 2799 | 2147 | 1937 |      |      |      |      |      |      |      |      |      |
| 670 | 1796  | 1296  | 2831  | 4575 | 2737 | 2829 | 2002 | 2468 |      |      |      |      |      |      |      |      |
| 680 | 3055  | 2164  | 1419  | 2664 | 3446 | 2125 | 2706 | 1686 | 1802 |      |      |      |      |      |      |      |
| 690 | 2442  | 4185  | 4091  | 2741 | 3873 | 3039 | 2660 | 1785 | 2238 | 1884 |      |      |      |      |      |      |
| 700 | 2829  | 3341  | 3715  | 1874 | 2778 | 4554 | 2793 | 2391 | 2336 | 1573 | 1564 |      |      |      |      |      |
| 710 | 1946  | 2348  | 2838  | 2845 | 1397 | 2812 | 2919 | 2948 | 3655 | 2359 | 1844 | 1712 |      |      |      |      |
| 720 | 2735  | 1807  | 1920  | 1819 | 2079 | 1737 | 1951 | 2071 | 3610 | 2768 | 3317 | 1973 | 2322 |      |      |      |
| 730 | 1506  | 3408  | 1007  | 1995 | 1760 | 1212 | 1236 | 2336 | 3637 | 4712 | 4793 | 2470 | 1059 | 1568 |      |      |
| 740 | 3033  | 2236  | 6899  | 1532 | 1858 | 3577 | 1684 | 1040 | 4791 | 4263 | 5063 | 4515 | 4373 | 1159 | 2264 |      |
| 750 | 2728  | 4182  | 3389  | 2298 | 1419 | 2984 | 3185 | 1890 | 1158 | 3850 | 2860 | 4466 | 5504 | 4210 | 2847 | 2109 |

Table S4: 3D Fluorescence Data of BG-1 Apatite.

|     | 260   | 270   | 280   | 290   | 300    | 310    | 320    | 330    | 340   | 350   | 360   | 370   | 380   | 390   | 400   | 410   |
|-----|-------|-------|-------|-------|--------|--------|--------|--------|-------|-------|-------|-------|-------|-------|-------|-------|
| 280 | 19230 |       |       |       |        |        |        |        |       |       |       |       |       |       |       |       |
| 290 | 28219 | 17373 |       |       |        |        |        |        |       |       |       |       |       |       |       |       |
| 300 | 94304 | 38417 | 17323 |       |        |        |        |        |       |       |       |       |       |       |       |       |
| 310 | 97296 | 52120 | 23190 | 13087 |        |        |        |        |       |       |       |       |       |       |       |       |
| 320 | 74375 | 49635 | 32471 | 22637 | 18494  |        |        |        |       |       |       |       |       |       |       |       |
| 330 | 66757 | 47971 | 41829 | 52604 | 49824  | 38544  |        |        |       |       |       |       |       |       |       |       |
| 340 | 49163 | 46663 | 57606 | 75229 | 93240  | 86265  | 46052  |        |       |       |       |       |       |       |       |       |
| 350 | 61225 | 53784 | 64673 | 80656 | 110619 | 114131 | 70512  | 25612  |       |       |       |       |       |       |       |       |
| 360 | 47463 | 51779 | 61927 | 90526 | 124744 | 131510 | 105148 | 45115  | 12049 |       |       |       |       |       |       |       |
| 370 | 31826 | 53218 | 65954 | 97789 | 132822 | 155999 | 129687 | 67705  | 18776 | 4668  |       |       |       |       |       |       |
| 380 | 30137 | 48376 | 66429 | 97444 | 135840 | 158958 | 146904 | 85895  | 29133 | 7922  | 3056  |       |       |       |       |       |
| 390 | 29211 | 44171 | 55584 | 91444 | 128320 | 155785 | 157253 | 104672 | 37446 | 9971  | 3649  | 2201  |       |       |       |       |
| 400 | 30756 | 40476 | 55120 | 76846 | 109857 | 139667 | 146924 | 104194 | 42243 | 13446 | 5013  | 2631  | 1990  |       |       |       |
| 410 | 30120 | 39064 | 45443 | 65945 | 97127  | 116596 | 128680 | 95032  | 40158 | 13665 | 6619  | 5285  | 3987  | 4138  |       |       |
| 420 | 27254 | 32654 | 38386 | 75560 | 75355  | 91021  | 103580 | 82912  | 35607 | 15125 | 8374  | 6934  | 6455  | 6274  | 7287  |       |
| 430 | 15580 | 25682 | 30864 | 74152 | 59356  | 73484  | 75896  | 62089  | 29796 | 14247 | 9871  | 8099  | 7698  | 8838  | 8159  | 6156  |
| 440 | 15768 | 18400 | 24147 | 32330 | 41830  | 53977  | 56117  | 44635  | 24676 | 14087 | 10814 | 9640  | 10464 | 10943 | 12652 | 8826  |
| 450 | 15109 | 14834 | 15982 | 24226 | 28890  | 44031  | 39494  | 31761  | 19169 | 12386 | 11361 | 10513 | 9546  | 10350 | 12175 | 9897  |
| 460 | 10717 | 9358  | 12464 | 15339 | 20302  | 27610  | 28051  | 24177  | 13296 | 10917 | 9107  | 8630  | 9166  | 9612  | 10431 | 9496  |
| 470 | 10757 | 10572 | 10446 | 13786 | 17218  | 20673  | 23231  | 17795  | 12166 | 8546  | 8308  | 7931  | 8893  | 9167  | 10057 | 7874  |
| 480 | 9715  | 10399 | 9238  | 12573 | 17587  | 19038  | 20969  | 17651  | 9803  | 7688  | 7292  | 6143  | 7682  | 10063 | 8626  | 7007  |
| 490 | 10832 | 7751  | 10396 | 10769 | 12019  | 16093  | 14821  | 12637  | 9498  | 6638  | 5788  | 5298  | 5643  | 7082  | 7506  | 6185  |
| 500 | 7703  | 8196  | 6013  | 7507  | 8435   | 9875   | 10788  | 8849   | 5903  | 5175  | 4239  | 4476  | 4525  | 4849  | 6571  | 5099  |
| 510 |       | 8412  | 6495  | 7898  | 10023  | 8930   | 8360   | 7230   | 4928  | 3813  | 3730  | 3687  | 3183  | 3630  | 4893  | 4571  |
| 520 |       | 6543  | 5359  | 6507  | 7419   | 8461   | 9487   | 5729   | 4170  | 2896  | 3173  | 2718  | 2684  | 2754  | 5014  | 4492  |
| 530 |       |       | 8157  | 8876  | 8539   | 9622   | 8495   | 6681   | 4108  | 2809  | 2030  | 1976  | 2301  | 2412  | 4444  | 5520  |
| 540 |       |       | 9267  | 10012 | 13024  | 14248  | 12174  | 6642   | 3468  | 2738  | 2027  | 1841  | 1882  | 1844  | 4914  | 7336  |
| 550 |       |       |       | 14776 | 17310  | 17200  | 14694  | 9017   | 3824  | 2400  | 1777  | 1789  | 2096  | 1882  | 6292  | 8615  |
| 560 |       |       |       | 16033 | 19133  | 20070  | 20347  | 10144  | 4111  | 2223  | 2464  | 2133  | 2067  | 2098  | 14193 | 13195 |
| 570 |       |       |       |       | 26563  | 25105  | 21090  | 11671  | 4792  | 2820  | 2664  | 1985  | 2427  | 4025  | 14172 | 13438 |
| 580 |       |       |       |       | 25275  | 28540  | 19299  | 12377  | 4968  | 3360  | 2771  | 1710  | 2683  | 4807  | 8309  | 10189 |
| 590 |       |       |       |       |        | 25746  | 20727  | 9532   | 5156  | 2662  | 2293  | 2265  | 2189  | 2789  | 14917 | 12380 |
| 600 |       |       |       |       |        | 34454  | 31133  | 17363  | 7666  | 2518  | 6852  | 5503  | 6657  | 9424  | 95015 | 35133 |
| 610 |       |       |       |       |        |        | 26613  | 14567  | 4831  | 2316  | 3400  | 2874  | 3651  | 3746  | 28692 | 16905 |
| 620 |       |       |       |       |        |        | 19393  | 15641  | 4529  | 2165  | 2677  | 2060  | 3178  | 2191  | 8549  | 8671  |
| 630 |       |       |       |       |        |        |        | 9945   | 3247  | 1624  | 2220  | 2209  | 1526  | 1944  | 7697  | 7831  |
| 640 |       |       |       |       |        |        |        | 8776   | 6199  | 3065  | 2788  | 2598  | 3025  | 3223  | 20055 | 10929 |
| 650 |       |       |       |       |        |        |        |        | 5834  | 1908  | 2575  | 3067  | 3997  | 4188  | 25000 | 12463 |
| 660 |       |       |       |       |        |        |        |        | 4779  | 3295  | 2416  | 1936  | 1716  | 3108  | 12119 | 7298  |
| 670 |       |       |       |       |        |        |        |        |       | 4772  | 1700  | 1875  | 2444  | 2221  | 3656  | 4496  |
| 680 |       |       |       |       |        |        |        |        |       | 3276  | 2489  | 1241  | 1215  | 1814  | 3693  | 2634  |
| 690 |       |       |       |       |        |        |        |        |       |       | 4922  | 1533  | 1688  | 3038  | 5469  | 4335  |
| 700 |       |       |       |       |        |        |        |        |       |       | 5159  | 2330  | 2343  | 3165  | 8917  | 4577  |
| 710 |       |       |       |       |        |        |        |        |       |       |       | 4799  | 2307  | 2751  | 10185 | 6574  |
| 720 |       |       |       |       |        |        |        |        |       |       |       | 6245  | 3304  | 2380  | 6405  | 7816  |
| 730 |       |       |       |       |        |        |        |        |       |       |       |       | 4139  | 2098  | 4672  | 3707  |
| 740 |       |       |       |       |        |        |        |        |       |       |       |       | 3779  | 5453  | 3367  | 3124  |
| 750 |       |       |       |       |        |        |        |        |       |       |       |       |       | 3833  | 4807  | 6562  |

Table S5: 3D Fluorescence Data of BG-1 Apatite.

|     | 420   | 430   | 440    | 450    | 460    | 470    | 480    | 490   | 500   | 510  | 520  | 530  | 540  | 550  | 560  | 570   |
|-----|-------|-------|--------|--------|--------|--------|--------|-------|-------|------|------|------|------|------|------|-------|
| 280 |       |       |        |        |        |        |        |       |       |      |      |      |      |      |      |       |
| 290 |       |       |        |        |        |        |        |       |       |      |      |      |      |      |      |       |
| 300 |       |       |        |        |        |        |        |       |       |      |      |      |      |      |      |       |
| 310 |       |       |        |        |        |        |        |       |       |      |      |      |      |      |      |       |
| 320 |       |       |        |        |        |        |        |       |       |      |      |      |      |      |      |       |
| 330 |       |       |        |        |        |        |        |       |       |      |      |      |      |      |      |       |
| 340 |       |       |        |        |        |        |        |       |       |      |      |      |      |      |      |       |
| 350 |       |       |        |        |        |        |        |       |       |      |      |      |      |      |      |       |
| 360 |       |       |        |        |        |        |        |       |       |      |      |      |      |      |      |       |
| 370 |       |       |        |        |        |        |        |       |       |      |      |      |      |      |      |       |
| 380 |       |       |        |        |        |        |        |       |       |      |      |      |      |      |      |       |
| 390 |       |       |        |        |        |        |        |       |       |      |      |      |      |      |      |       |
| 400 |       |       |        |        |        |        |        |       |       |      |      |      |      |      |      |       |
| 410 |       |       |        |        |        |        |        |       |       |      |      |      |      |      |      |       |
| 420 |       |       |        |        |        |        |        |       |       |      |      |      |      |      |      |       |
| 430 |       |       |        |        |        |        |        |       |       |      |      |      |      |      |      |       |
| 440 | 4575  |       |        |        |        |        |        |       |       |      |      |      |      |      |      |       |
| 450 | 5008  | 4672  |        |        |        |        |        |       |       |      |      |      |      |      |      |       |
| 460 | 4903  | 3814  | 5448   |        |        |        |        |       |       |      |      |      |      |      |      |       |
| 470 | 5491  | 4544  | 5529   | 7846   |        |        |        |       |       |      |      |      |      |      |      |       |
| 480 | 4668  | 5805  | 9394   | 12431  | 9878   |        |        |       |       |      |      |      |      |      |      |       |
| 490 | 4480  | 4711  | 27221  | 34360  | 15401  | 25530  |        |       |       |      |      |      |      |      |      |       |
| 500 | 4090  | 4190  | 11227  | 14869  | 8635   | 10585  | 8481   |       |       |      |      |      |      |      |      |       |
| 510 | 3563  | 3444  | 4635   | 4636   | 6099   | 5276   | 4267   | 5240  |       |      |      |      |      |      |      |       |
| 520 | 4021  | 3220  | 4229   | 7123   | 9399   | 6057   | 4778   | 4169  | 5530  |      |      |      |      |      |      |       |
| 530 | 3783  | 3810  | 6581   | 9592   | 7730   | 16244  | 7497   | 6086  | 4459  | 4676 |      |      |      |      |      |       |
| 540 | 5313  | 4353  | 6390   | 7681   | 10744  | 9694   | 10343  | 8454  | 5345  | 4118 | 4420 |      |      |      |      |       |
| 550 | 6318  | 5120  | 11050  | 7752   | 7412   | 9472   | 6993   | 10753 | 10536 | 4493 | 3847 | 4130 |      |      |      |       |
| 560 | 11791 | 7639  | 8772   | 10936  | 9124   | 13391  | 10347  | 8311  | 14033 | 5674 | 3664 | 3179 | 3884 |      |      |       |
| 570 | 10769 | 6573  | 8745   | 10659  | 12423  | 14121  | 11357  | 9181  | 6300  | 8076 | 4639 | 2941 | 2738 | 2531 |      |       |
| 580 | 7623  | 6959  | 13595  | 17860  | 10507  | 15959  | 11601  | 8521  | 5689  | 4253 | 4794 | 3413 | 2414 | 1880 | 2594 |       |
| 590 | 12175 | 6928  | 57058  | 70286  | 31170  | 59634  | 32586  | 22132 | 6401  | 5259 | 3394 | 5007 | 2940 | 2218 | 2059 | 4688  |
| 600 | 45566 | 15716 | 167680 | 211198 | 107449 | 204937 | 112483 | 68793 | 11982 | 5210 | 5103 | 5258 | 4711 | 3990 | 3743 | 12106 |
| 610 | 18816 | 11596 | 156380 | 185517 | 83302  | 151466 | 96150  | 59886 | 9344  | 4173 | 5872 | 3321 | 4230 | 3011 | 3371 | 12879 |
| 620 | 7533  | 8928  | 71276  | 81732  | 42293  | 62930  | 45209  | 24152 | 7705  | 3667 | 3711 | 3338 | 2768 | 3998 | 1785 | 6983  |
| 630 | 7823  | 5161  | 27088  | 30218  | 16145  | 23706  | 20581  | 12457 | 4671  | 4818 | 3341 | 2336 | 1756 | 1354 | 2684 | 3281  |
| 640 | 13706 | 6852  | 12656  | 14893  | 11584  | 20042  | 15248  | 12784 | 4354  | 2943 | 2342 | 2598 | 2118 | 1981 | 1560 | 2544  |
| 650 | 16282 | 6886  | 18983  | 22956  | 14904  | 28961  | 17335  | 12941 | 7919  | 5348 | 7237 | 2416 | 1839 | 1563 | 1494 | 1212  |
| 660 | 9236  | 4557  | 5957   | 6923   | 7718   | 12236  | 10235  | 7085  | 4756  | 3617 | 2509 | 5932 | 2177 | 1393 | 1307 | 1300  |
| 670 | 5306  | 6198  | 7167   | 9458   | 7206   | 7837   | 9214   | 5259  | 3369  | 3264 | 1803 | 1625 | 3039 | 1661 | 1266 | 2136  |
| 680 | 3985  | 5153  | 8376   | 12263  | 8001   | 9853   | 6354   | 6586  | 3944  | 4959 | 2940 | 1668 | 2091 | 2251 | 1468 | 1300  |
| 690 | 4849  | 7953  | 15465  | 14532  | 10213  | 12513  | 9714   | 8932  | 6874  | 3030 | 3066 | 5695 | 1735 | 1800 | 1273 | 1598  |
| 700 | 6238  | 6072  | 16847  | 20040  | 12348  | 21740  | 12750  | 10371 | 6427  | 3320 | 2568 | 1808 | 2389 | 3256 | 2502 | 1404  |
| 710 | 8954  | 5437  | 17219  | 17158  | 13618  | 21621  | 14658  | 11801 | 6516  | 4206 | 2393 | 1693 | 2942 | 1637 | 1267 | 4889  |
| 720 | 4888  | 6064  | 11234  | 15596  | 10925  | 11994  | 9919   | 7017  | 9615  | 4795 | 2436 | 2542 | 3246 | 1390 | 1895 | 1273  |
| 730 | 4338  | 12515 | 10586  | 19109  | 11616  | 16495  | 10538  | 13306 | 4727  | 5367 | 3882 | 4553 | 2220 | 2135 | 3549 | 1099  |
| 740 | 8664  | 4166  | 12563  | 10423  | 12831  | 11073  | 8528   | 10983 | 6315  | 7187 | 6040 | 4897 | 2155 | 1842 | 1258 | 1636  |
| 750 | 4265  | 5476  | 8665   | 14579  | 9415   | 13214  | 10904  | 6653  | 6532  | 4042 | 7131 | 2298 | 3213 | 1056 | 1321 | 1994  |

Table S6: 3D Fluorescence Data of BG-1 Apatite.

|     | 580   | 590   | 600   | 610  | 620  | 630  | 640  | 650  | 660  | 670  | 680  | 690  | 700  | 710  | 720 | 730  |
|-----|-------|-------|-------|------|------|------|------|------|------|------|------|------|------|------|-----|------|
| 280 |       |       |       |      |      |      |      |      |      |      |      |      |      |      |     |      |
| 290 |       |       |       |      |      |      |      |      |      |      |      |      |      |      |     |      |
| 300 |       |       |       |      |      |      |      |      |      |      |      |      |      |      |     |      |
| 310 |       |       |       |      |      |      |      |      |      |      |      |      |      |      |     |      |
| 320 |       |       |       |      |      |      |      |      |      |      |      |      |      |      |     |      |
| 330 |       |       |       |      |      |      |      |      |      |      |      |      |      |      |     |      |
| 340 |       |       |       |      |      |      |      |      |      |      |      |      |      |      |     |      |
| 350 |       |       |       |      |      |      |      |      |      |      |      |      |      |      |     |      |
| 360 |       |       |       |      |      |      |      |      |      |      |      |      |      |      |     |      |
| 370 |       |       |       |      |      |      |      |      |      |      |      |      |      |      |     |      |
| 380 |       |       |       |      |      |      |      |      |      |      |      |      |      |      |     |      |
| 390 |       |       |       |      |      |      |      |      |      |      |      |      |      |      |     |      |
| 400 |       |       |       |      |      |      |      |      |      |      |      |      |      |      |     |      |
| 410 |       |       |       |      |      |      |      |      |      |      |      |      |      |      |     |      |
| 420 |       |       |       |      |      |      |      |      |      |      |      |      |      |      |     |      |
| 430 |       |       |       |      |      |      |      |      |      |      |      |      |      |      |     |      |
| 440 |       |       |       |      |      |      |      |      |      |      |      |      |      |      |     |      |
| 450 |       |       |       |      |      |      |      |      |      |      |      |      |      |      |     |      |
| 460 |       |       |       |      |      |      |      |      |      |      |      |      |      |      |     |      |
| 470 |       |       |       |      |      |      |      |      |      |      |      |      |      |      |     |      |
| 480 |       |       |       |      |      |      |      |      |      |      |      |      |      |      |     |      |
| 490 |       |       |       |      |      |      |      |      |      |      |      |      |      |      |     |      |
| 500 |       |       |       |      |      |      |      |      |      |      |      |      |      |      |     |      |
| 510 |       |       |       |      |      |      |      |      |      |      |      |      |      |      |     |      |
| 520 |       |       |       |      |      |      |      |      |      |      |      |      |      |      |     |      |
| 530 |       |       |       |      |      |      |      |      |      |      |      |      |      |      |     |      |
| 540 |       |       |       |      |      |      |      |      |      |      |      |      |      |      |     |      |
| 550 |       |       |       |      |      |      |      |      |      |      |      |      |      |      |     |      |
| 560 |       |       |       |      |      |      |      |      |      |      |      |      |      |      |     |      |
| 570 |       |       |       |      |      |      |      |      |      |      |      |      |      |      |     |      |
| 580 |       |       |       |      |      |      |      |      |      |      |      |      |      |      |     |      |
| 590 |       |       |       |      |      |      |      |      |      |      |      |      |      |      |     |      |
| 600 | 20437 |       |       |      |      |      |      |      |      |      |      |      |      |      |     |      |
| 610 | 16224 | 30395 |       |      |      |      |      |      |      |      |      |      |      |      |     |      |
| 620 | 6785  | 12317 | 10128 |      |      |      |      |      |      |      |      |      |      |      |     |      |
| 630 | 3066  | 4592  | 3656  | 1926 |      |      |      |      |      |      |      |      |      |      |     |      |
| 640 | 1671  | 1843  | 1438  | 1014 | 1099 |      |      |      |      |      |      |      |      |      |     |      |
| 650 | 2542  | 1848  | 1072  | 932  | 856  | 669  |      |      |      |      |      |      |      |      |     |      |
| 660 | 695   | 2055  | 2366  | 917  | 988  | 836  | 1028 |      |      |      |      |      |      |      |     |      |
| 670 | 1540  | 984   | 2010  | 1508 | 1037 | 702  | 633  | 1036 |      |      |      |      |      |      |     |      |
| 680 | 1359  | 1709  | 649   | 912  | 1040 | 901  | 584  | 447  | 1041 |      |      |      |      |      |     |      |
| 690 | 1778  | 2960  | 2180  | 1310 | 1221 | 799  | 511  | 574  | 629  | 611  |      |      |      |      |     |      |
| 700 | 1551  | 3176  | 1677  | 1503 | 1880 | 1833 | 1208 | 519  | 685  | 664  | 902  |      |      |      |     |      |
| 710 | 1505  | 1525  | 2195  | 1228 | 880  | 1836 | 1011 | 1315 | 787  | 679  | 1037 | 473  |      |      |     |      |
| 720 | 1778  | 1923  | 962   | 930  | 1354 | 1262 | 1362 | 965  | 1111 | 489  | 598  | 462  | 704  |      |     |      |
| 730 | 885   | 1510  | 1058  | 1022 | 975  | 1558 | 896  | 1644 | 1340 | 1072 | 979  | 775  | 810  | 1065 |     |      |
| 740 | 1718  | 1086  | 1740  | 941  | 1965 | 2156 | 1354 | 1221 | 3362 | 845  | 1523 | 1060 | 1006 | 710  | 512 |      |
| 750 | 2212  | 1182  | 2256  | 1415 | 965  | 548  | 813  | 1329 | 1078 | 3349 | 1667 | 1022 | 1481 | 1628 | 921 | 1268 |

Table S7: 3D Fluorescence Data of B-1 Apatite.

|     | 260    | 270     | 280     | 290     | 300     | 310     | 320     | 330     | 340     | 350    | 360   | 370   | 380   | 390   | 400    | 410    |
|-----|--------|---------|---------|---------|---------|---------|---------|---------|---------|--------|-------|-------|-------|-------|--------|--------|
| 280 | 202602 |         |         |         |         |         |         |         |         |        |       |       |       |       |        |        |
| 290 | 237771 | 129388  |         |         |         |         |         |         |         |        |       |       |       |       |        |        |
| 300 | 190683 | 136954  | 101413  |         |         |         |         |         |         |        |       |       |       |       |        |        |
| 310 | 123044 | 97998   | 98505   | 93082   |         |         |         |         |         |        |       |       |       |       |        |        |
| 320 | 105275 | 144264  | 172431  | 213497  | 212017  |         |         |         |         |        |       |       |       |       |        |        |
| 330 | 325292 | 426262  | 558842  | 722659  | 882847  | 736725  |         |         |         |        |       |       |       |       |        |        |
| 340 | 513859 | 803993  | 1072124 | 1419675 | 1785453 | 1779774 | 1387269 |         |         |        |       |       |       |       |        |        |
| 350 | 696943 | 1116001 | 1488964 | 1875245 | 2343747 | 2445031 | 2316228 | 2028266 |         |        |       |       |       |       |        |        |
| 360 | 809091 | 1307625 | 1689864 | 2165252 | 2634601 | 2863004 | 3020441 | 3346097 | 1547273 |        |       |       |       |       |        |        |
| 370 | 812615 | 1357319 | 1791511 | 2261582 | 2810209 | 3128563 | 3478562 | 4202675 | 2145778 | 365416 |       |       |       |       |        |        |
| 380 | 753596 | 1302810 | 1642406 | 2056847 | 2633973 | 2996798 | 3533589 | 4617243 | 2524991 | 444725 | 54181 |       |       |       |        |        |
| 390 | 673845 | 1138754 | 1429344 | 1770120 | 2254405 | 2618498 | 3256593 | 4563844 | 2638601 | 493164 | 62684 | 15954 |       |       |        |        |
| 400 | 547658 | 951171  | 1175844 | 1445924 | 1815641 | 2115040 | 2734375 | 3924562 | 2384964 | 470979 | 70481 | 20226 | 16024 |       |        |        |
| 410 | 445856 | 709378  | 887898  | 1137858 | 1409602 | 1671870 | 2169433 | 3054337 | 1908354 | 412395 | 71241 | 34269 | 36713 | 42309 |        |        |
| 420 | 341153 | 520495  | 635533  | 813829  | 1029299 | 1228698 | 1590242 | 2144562 | 1357648 | 319455 | 69545 | 45858 | 59742 | 69197 | 71058  |        |
| 430 | 232902 | 334592  | 421168  | 590880  | 684629  | 807250  | 1050893 | 1374831 | 885610  | 226504 | 61166 | 50521 | 68718 | 83677 | 81041  | 59031  |
| 440 | 196115 | 225642  | 289854  | 347067  | 437444  | 526450  | 679230  | 871229  | 567647  | 154776 | 55204 | 56462 | 81067 | 98586 | 106792 | 66476  |
| 450 | 156304 | 163815  | 198855  | 238448  | 287626  | 368733  | 434754  | 543564  | 362282  | 111398 | 51594 | 54265 | 75037 | 86976 | 97602  | 71472  |
| 460 | 117416 | 136884  | 136612  | 168634  | 207175  | 252551  | 322873  | 381241  | 254911  | 84636  | 39638 | 51220 | 65564 | 78483 | 79236  | 69834  |
| 470 | 118216 | 103908  | 109059  | 135535  | 163549  | 190312  | 232061  | 280661  | 184394  | 64454  | 36067 | 43392 | 60258 | 71022 | 76704  | 52057  |
| 480 | 121735 | 98233   | 98943   | 118654  | 152295  | 172628  | 207126  | 244319  | 149785  | 59548  | 29304 | 36982 | 52090 | 65444 | 62551  | 47980  |
| 490 | 146183 | 78643   | 123922  | 97286   | 114158  | 137049  | 165041  | 185068  | 121469  | 46304  | 22108 | 28987 | 41411 | 52106 | 51431  | 39627  |
| 500 | 93871  | 70449   | 64886   | 74390   | 87098   | 99428   | 118514  | 132547  | 84731   | 31046  | 17688 | 22817 | 33377 | 38900 | 56050  | 34317  |
| 510 |        | 83521   | 67277   | 66908   | 77649   | 80718   | 90425   | 103179  | 66489   | 29263  | 15282 | 20437 | 24513 | 31323 | 37362  | 34001  |
| 520 |        | 76963   | 58654   | 55982   | 63773   | 69966   | 84336   | 87308   | 56525   | 21227  | 16746 | 14989 | 18898 | 24378 | 30686  | 25358  |
| 530 |        |         | 81748   | 72327   | 70625   | 70839   | 79637   | 82532   | 50896   | 18458  | 10131 | 11780 | 14759 | 15809 | 22257  | 25702  |
| 540 |        |         | 96741   | 81430   | 92150   | 99263   | 105035  | 97367   | 57669   | 19842  | 10479 | 10468 | 12773 | 15357 | 25155  | 28890  |
| 550 |        |         |         | 127889  | 122229  | 120838  | 123977  | 112396  | 63256   | 20581  | 9698  | 10090 | 14610 | 12455 | 26549  | 31059  |
| 560 |        |         |         | 125265  | 142236  | 142419  | 144605  | 129261  | 62507   | 20974  | 13780 | 10083 | 11114 | 12689 | 44989  | 40678  |
| 570 |        |         |         |         | 187328  | 181544  | 172187  | 160300  | 79286   | 32027  | 16377 | 10926 | 12357 | 17520 | 44240  | 43149  |
| 580 |        |         |         |         | 176445  | 193583  | 185428  | 173891  | 82210   | 38355  | 15311 | 9087  | 12886 | 17791 | 26609  | 30661  |
| 590 |        |         |         |         |         | 185648  | 175772  | 157349  | 82616   | 27888  | 15938 | 10663 | 13395 | 12693 | 44305  | 37778  |
| 600 |        |         |         |         |         | 277135  | 285234  | 258239  | 138347  | 39612  | 57585 | 29212 | 34172 | 34277 | 273104 | 95742  |
| 610 |        |         |         |         |         |         | 227565  | 209469  | 103920  | 29646  | 26610 | 12582 | 16052 | 14940 | 86691  | 48598  |
| 620 |        |         |         |         |         |         | 153035  | 157273  | 75476   | 22294  | 11644 | 9106  | 14365 | 10109 | 34414  | 32259  |
| 630 |        |         |         |         |         |         |         | 119713  | 59289   | 20727  | 15662 | 9568  | 8272  | 9368  | 28268  | 25044  |
| 640 |        |         |         |         |         |         |         | 114629  | 63935   | 26850  | 16723 | 15524 | 17155 | 12705 | 60134  | 39229  |
| 650 |        |         |         |         |         |         |         |         | 66043   | 20110  | 21962 | 17643 | 16018 | 17511 | 81762  | 42080  |
| 660 |        |         |         |         |         |         |         |         | 65337   | 26206  | 19175 | 10152 | 10814 | 16470 | 37018  | 28724  |
| 670 |        |         |         |         |         |         |         |         |         | 30978  | 11594 | 10883 | 28229 | 10421 | 18858  | 18565  |
| 680 |        |         |         |         |         |         |         |         |         | 41481  | 23311 | 12386 | 9924  | 11593 | 33867  | 17691  |
| 690 |        |         |         |         |         |         |         |         |         |        | 28670 | 11260 | 13929 | 19409 | 27517  | 29180  |
| 700 |        |         |         |         |         |         |         |         |         |        | 30947 | 27316 | 18194 | 15076 | 45831  | 33698  |
| 710 |        |         |         |         |         |         |         |         |         |        |       | 26132 | 19189 | 21507 | 39233  | 48266  |
| 720 |        |         |         |         |         |         |         |         |         |        |       | 24073 | 36612 | 25577 | 39499  | 94358  |
| 730 |        |         |         |         |         |         |         |         |         |        |       |       | 25477 | 29040 | 48548  | 43956  |
| 740 |        |         |         |         |         |         |         |         |         |        |       |       | 28285 | 54534 | 46804  | 48528  |
| 750 |        |         |         |         |         |         |         |         |         |        |       |       |       | 30341 | 77171  | 119555 |

Table S8: 3D Fluorescence Data of B-1 Apatite.

|     | 420    | 430    | 440    | 450    | 460    | 470    | 480    | 490    | 500   | 510   | 520   | 530   | 540   | 550   | 560   | 570   |
|-----|--------|--------|--------|--------|--------|--------|--------|--------|-------|-------|-------|-------|-------|-------|-------|-------|
| 280 |        |        |        |        |        |        |        |        |       |       |       |       |       |       |       |       |
| 290 |        |        |        |        |        |        |        |        |       |       |       |       |       |       |       |       |
| 300 |        |        |        |        |        |        |        |        |       |       |       |       |       |       |       |       |
| 310 |        |        |        |        |        |        |        |        |       |       |       |       |       |       |       |       |
| 320 |        |        |        |        |        |        |        |        |       |       |       |       |       |       |       |       |
| 330 |        |        |        |        |        |        |        |        |       |       |       |       |       |       |       |       |
| 340 |        |        |        |        |        |        |        |        |       |       |       |       |       |       |       |       |
| 350 |        |        |        |        |        |        |        |        |       |       |       |       |       |       |       |       |
| 360 |        |        |        |        |        |        |        |        |       |       |       |       |       |       |       |       |
| 370 |        |        |        |        |        |        |        |        |       |       |       |       |       |       |       |       |
| 380 |        |        |        |        |        |        |        |        |       |       |       |       |       |       |       |       |
| 390 |        |        |        |        |        |        |        |        |       |       |       |       |       |       |       |       |
| 400 |        |        |        |        |        |        |        |        |       |       |       |       |       |       |       |       |
| 410 |        |        |        |        |        |        |        |        |       |       |       |       |       |       |       |       |
| 420 |        |        |        |        |        |        |        |        |       |       |       |       |       |       |       |       |
| 430 |        |        |        |        |        |        |        |        |       |       |       |       |       |       |       |       |
| 440 | 39347  |        |        |        |        |        |        |        |       |       |       |       |       |       |       |       |
| 450 | 36534  | 41145  |        |        |        |        |        |        |       |       |       |       |       |       |       |       |
| 460 | 36263  | 27508  | 38052  |        |        |        |        |        |       |       |       |       |       |       |       |       |
| 470 | 47232  | 30836  | 32822  | 44808  |        |        |        |        |       |       |       |       |       |       |       |       |
| 480 | 28150  | 34772  | 39043  | 44277  | 57264  |        |        |        |       |       |       |       |       |       |       |       |
| 490 | 27217  | 25108  | 71091  | 75583  | 55699  | 69207  |        |        |       |       |       |       |       |       |       |       |
| 500 | 23640  | 23139  | 32525  | 58439  | 39733  | 39495  | 42330  |        |       |       |       |       |       |       |       |       |
| 510 | 20365  | 19044  | 22942  | 29802  | 40044  | 29353  | 26628  | 36804  |       |       |       |       |       |       |       |       |
| 520 | 25138  | 18075  | 21484  | 36081  | 53979  | 34268  | 25735  | 26560  | 36231 |       |       |       |       |       |       |       |
| 530 | 17322  | 16891  | 24402  | 31827  | 36152  | 86476  | 35259  | 29949  | 25691 | 32773 |       |       |       |       |       |       |
| 540 | 22338  | 20118  | 24994  | 28755  | 59455  | 45537  | 60918  | 47256  | 28228 | 23802 | 33201 |       |       |       |       |       |
| 550 | 24846  | 20705  | 76017  | 29993  | 29863  | 40571  | 28913  | 58006  | 63720 | 22856 | 21727 | 28883 |       |       |       |       |
| 560 | 35138  | 45709  | 43564  | 53092  | 33474  | 38522  | 34240  | 26733  | 66600 | 37241 | 17904 | 17332 | 28900 |       |       |       |
| 570 | 29714  | 24421  | 33637  | 31508  | 57322  | 37634  | 35105  | 30484  | 22162 | 46722 | 28557 | 15697 | 16466 | 27208 |       |       |
| 580 | 29000  | 25530  | 35965  | 40601  | 31532  | 44081  | 35116  | 27422  | 20076 | 14590 | 21807 | 19505 | 15969 | 14669 | 19582 |       |
| 590 | 36458  | 25294  | 115922 | 141355 | 67468  | 117945 | 73327  | 51213  | 24098 | 25972 | 14279 | 25306 | 18495 | 15258 | 12170 | 21117 |
| 600 | 111075 | 56785  | 346474 | 407286 | 229162 | 368754 | 267659 | 136229 | 34634 | 22870 | 25218 | 20570 | 30021 | 22390 | 16124 | 31437 |
| 610 | 55149  | 38579  | 318784 | 341443 | 167596 | 282411 | 204643 | 148965 | 30968 | 17832 | 32385 | 16642 | 26900 | 21662 | 17892 | 30008 |
| 620 | 27554  | 45992  | 162814 | 179264 | 94320  | 124479 | 105648 | 56354  | 40041 | 19058 | 15123 | 20436 | 16191 | 28985 | 14938 | 22305 |
| 630 | 27563  | 22572  | 78041  | 86618  | 48526  | 55932  | 61970  | 40616  | 19325 | 26005 | 18987 | 14182 | 13579 | 11099 | 22904 | 18043 |
| 640 | 47075  | 37747  | 48906  | 51550  | 40995  | 47106  | 50073  | 45803  | 18881 | 16856 | 12312 | 14125 | 13547 | 13647 | 10243 | 21120 |
| 650 | 55026  | 44816  | 56971  | 66524  | 44716  | 67526  | 45379  | 42783  | 55145 | 32086 | 51869 | 11836 | 13956 | 11464 | 10542 | 7437  |
| 660 | 41099  | 24681  | 29519  | 28747  | 34067  | 46578  | 57117  | 30345  | 23394 | 20115 | 17971 | 37536 | 14330 | 11892 | 13029 | 9922  |
| 670 | 31174  | 58886  | 45765  | 57512  | 39749  | 41969  | 57398  | 28965  | 20944 | 26906 | 13038 | 11637 | 27463 | 13613 | 11654 | 16534 |
| 680 | 40774  | 39001  | 53868  | 66659  | 44336  | 44005  | 31673  | 34376  | 27364 | 24858 | 17682 | 13273 | 14216 | 27935 | 11689 | 11214 |
| 690 | 30230  | 72396  | 73583  | 47956  | 41204  | 40529  | 40910  | 37065  | 52680 | 20505 | 22879 | 48905 | 12941 | 14181 | 15470 | 9369  |
| 700 | 46210  | 51334  | 65173  | 83398  | 55388  | 79559  | 46746  | 53832  | 42969 | 25836 | 16912 | 14513 | 20755 | 33636 | 30933 | 11219 |
| 710 | 52596  | 50440  | 77122  | 80485  | 64849  | 86163  | 49432  | 59102  | 41788 | 32282 | 20750 | 14240 | 28457 | 16806 | 15395 | 34286 |
| 720 | 38945  | 60885  | 66357  | 82429  | 54452  | 46890  | 42777  | 37208  | 58649 | 29496 | 23618 | 18020 | 25913 | 18660 | 14400 | 13522 |
| 730 | 42789  | 161739 | 55970  | 120187 | 61047  | 85625  | 54412  | 79544  | 40229 | 48367 | 34611 | 36269 | 24498 | 24904 | 31810 | 10310 |
| 740 | 108277 | 46051  | 104719 | 66462  | 88550  | 76642  | 59367  | 89385  | 40709 | 51268 | 43761 | 39900 | 22383 | 16688 | 13448 | 17971 |
| 750 | 58772  | 71779  | 91480  | 107548 | 75530  | 83197  | 66383  | 43472  | 48926 | 32330 | 52102 | 20278 | 26611 | 24878 | 15739 | 27136 |



Table S9: 3D Fluorescence Data of B-1 Apatite.

|     | 580   | 590   | 600   | 610   | 620   | 630   | 640   | 650   | 660   | 670   | 680   | 690   | 700   | 710   | 720   | 730   |
|-----|-------|-------|-------|-------|-------|-------|-------|-------|-------|-------|-------|-------|-------|-------|-------|-------|
| 280 |       |       |       |       |       |       |       |       |       |       |       |       |       |       |       |       |
| 290 |       |       |       |       |       |       |       |       |       |       |       |       |       |       |       |       |
| 300 |       |       |       |       |       |       |       |       |       |       |       |       |       |       |       |       |
| 310 |       |       |       |       |       |       |       |       |       |       |       |       |       |       |       |       |
| 320 |       |       |       |       |       |       |       |       |       |       |       |       |       |       |       |       |
| 330 |       |       |       |       |       |       |       |       |       |       |       |       |       |       |       |       |
| 340 |       |       |       |       |       |       |       |       |       |       |       |       |       |       |       |       |
| 350 |       |       |       |       |       |       |       |       |       |       |       |       |       |       |       |       |
| 360 |       |       |       |       |       |       |       |       |       |       |       |       |       |       |       |       |
| 370 |       |       |       |       |       |       |       |       |       |       |       |       |       |       |       |       |
| 380 |       |       |       |       |       |       |       |       |       |       |       |       |       |       |       |       |
| 390 |       |       |       |       |       |       |       |       |       |       |       |       |       |       |       |       |
| 400 |       |       |       |       |       |       |       |       |       |       |       |       |       |       |       |       |
| 410 |       |       |       |       |       |       |       |       |       |       |       |       |       |       |       |       |
| 420 |       |       |       |       |       |       |       |       |       |       |       |       |       |       |       |       |
| 430 |       |       |       |       |       |       |       |       |       |       |       |       |       |       |       |       |
| 440 |       |       |       |       |       |       |       |       |       |       |       |       |       |       |       |       |
| 450 |       |       |       |       |       |       |       |       |       |       |       |       |       |       |       |       |
| 460 |       |       |       |       |       |       |       |       |       |       |       |       |       |       |       |       |
| 470 |       |       |       |       |       |       |       |       |       |       |       |       |       |       |       |       |
| 480 |       |       |       |       |       |       |       |       |       |       |       |       |       |       |       |       |
| 490 |       |       |       |       |       |       |       |       |       |       |       |       |       |       |       |       |
| 500 |       |       |       |       |       |       |       |       |       |       |       |       |       |       |       |       |
| 510 |       |       |       |       |       |       |       |       |       |       |       |       |       |       |       |       |
| 520 |       |       |       |       |       |       |       |       |       |       |       |       |       |       |       |       |
| 530 |       |       |       |       |       |       |       |       |       |       |       |       |       |       |       |       |
| 540 |       |       |       |       |       |       |       |       |       |       |       |       |       |       |       |       |
| 550 |       |       |       |       |       |       |       |       |       |       |       |       |       |       |       |       |
| 560 |       |       |       |       |       |       |       |       |       |       |       |       |       |       |       |       |
| 570 |       |       |       |       |       |       |       |       |       |       |       |       |       |       |       |       |
| 580 |       |       |       |       |       |       |       |       |       |       |       |       |       |       |       |       |
| 590 |       |       |       |       |       |       |       |       |       |       |       |       |       |       |       |       |
| 600 | 42898 |       |       |       |       |       |       |       |       |       |       |       |       |       |       |       |
| 610 | 35118 | 59796 |       |       |       |       |       |       |       |       |       |       |       |       |       |       |
| 620 | 17416 | 26516 | 27086 |       |       |       |       |       |       |       |       |       |       |       |       |       |
| 630 | 12277 | 12492 | 11666 | 10908 |       |       |       |       |       |       |       |       |       |       |       |       |
| 640 | 10489 | 10604 | 6418  | 7545  | 9009  |       |       |       |       |       |       |       |       |       |       |       |
| 650 | 12848 | 11593 | 9182  | 5988  | 6528  | 8113  |       |       |       |       |       |       |       |       |       |       |
| 660 | 4222  | 13303 | 19418 | 7537  | 6100  | 6717  | 8333  |       |       |       |       |       |       |       |       |       |
| 670 | 8727  | 5538  | 12728 | 15657 | 7971  | 6896  | 6553  | 8229  |       |       |       |       |       |       |       |       |
| 680 | 10707 | 8997  | 7546  | 9379  | 14340 | 7155  | 8072  | 7670  | 9535  |       |       |       |       |       |       |       |
| 690 | 9390  | 13144 | 11909 | 10374 | 13599 | 12458 | 8575  | 8542  | 9192  | 11679 |       |       |       |       |       |       |
| 700 | 7980  | 10329 | 12104 | 10437 | 15381 | 15139 | 13391 | 11067 | 10549 | 10098 | 12915 |       |       |       |       |       |
| 710 | 8257  | 9218  | 11921 | 14790 | 9872  | 17861 | 15655 | 16965 | 15839 | 16672 | 12914 | 12921 |       |       |       |       |
| 720 | 15288 | 9323  | 11254 | 11872 | 14535 | 13709 | 18382 | 17240 | 21943 | 18700 | 17060 | 12249 | 13026 |       |       |       |
| 730 | 11201 | 21045 | 12725 | 12454 | 13162 | 14961 | 16536 | 21937 | 28809 | 26275 | 20842 | 13208 | 11367 | 10733 |       |       |
| 740 | 12370 | 12492 | 24558 | 12494 | 13684 | 24618 | 21097 | 20902 | 36537 | 41221 | 28483 | 17158 | 12078 | 10221 | 11206 |       |
| 750 | 12294 | 17579 | 18644 | 11425 | 13739 | 18867 | 27660 | 25060 | 26929 | 40612 | 35241 | 18489 | 12855 | 9995  | 9144  | 12317 |
